# Supplementary material for: Software for Computing and Annotating Genomic Ranges
Source: PLOS journal article supplement (doi:10.1371/journal.pcbi.1003118), 2013-08-08
Supplement: S2 (10.1371/journal.pcbi.1003118.s002) [file journal.pcbi.1003118.s002]

|  | Union     | IntersectionStrict | IntersectionNotEmpty |
|--|-----------|--------------------|----------------------|
|  | Feature I | Feature I          | Feature I            |
|  | Feature I | No hit             | Feature I            |
|  | Feature I | No hit             | Feature I            |
|  | Feature I | Feature I          | Feature I            |
|  | Feature I | Feature I          | Feature I            |
|  | No hit    | Feature 1          | Feature I            |
|  | No hit    | No hit             | No hit               |

\* Picture reproduced from HTSeq web site :  
<http://www-huber.embl.de/users/anders/HTSeq/doc/count.html>
