# Supplementary material for: Software for Computing and Annotating Genomic Ranges
Source: PLOS journal article supplement (doi:10.1371/journal.pcbi.1003118), 2013-08-08
Supplement: S2 (10.1371/journal.pcbi.1003118.s002) [file journal.pcbi.1003118.s002]

# Counting with `summarizeOverlaps`

Valerie Obenchain

Edited: August 2012; Compiled: April 16, 2013

## Contents

|          |                          |          |
|----------|--------------------------|----------|
| <b>1</b> | <b>Introduction</b>      | <b>1</b> |
| <b>2</b> | <b>A First Example</b>   | <b>1</b> |
| <b>3</b> | <b>Counting Modes</b>    | <b>2</b> |
| <b>4</b> | <b>Counting Features</b> | <b>3</b> |
| <b>5</b> | <b>pasilla Data</b>      | <b>6</b> |
| 5.1      | source files . . . . .   | 6        |
| 5.2      | counting . . . . .       | 7        |
| <b>6</b> | <b>References</b>        | <b>8</b> |

## 1 Introduction

This vignette illustrates how reads mapped to a genome can be counted with `summarizeOverlaps`. Different "modes" of counting are provided to resolve reads that overlap multiple features. The built-in count modes are fashioned after the "Union", "IntersectionStrict", and "IntersectionNotEmpty" methods found in the HTSeq package by Simon Anders (see references).

## 2 A First Example

In this example reads are counted from a list of BAM files and returned in a `matrix` for use in further analysis such as those offered in DESeq and edgeR.

```
> library(Rsamtools)
> library(DESeq)
> library(edgeR)
> fls <- list.files(system.file("extdata",package="GenomicRanges"),
+   recursive=TRUE, pattern="*bam$", full=TRUE)
```

```

> bfl <- BamFileList(fls, index=character())
> features <- GRanges(
+   seqnames = c(rep("chr2L", 4), rep("chr2R", 5), rep("chr3L", 2)),
+   ranges = IRanges(c(1000, 3000, 4000, 7000, 2000, 3000, 3600, 4000,
+     7500, 5000, 5400), width=c(rep(500, 3), 600, 900, 500, 300, 900,
+     300, 500, 500)), "-"),
+   group_id=c(rep("A", 4), rep("B", 5), rep("C", 2)))
> olap <- summarizeOverlaps(features, bfl)
> dseq <- newCountDataSet(assays(olap)$counts, rownames(colData(olap)))
> edger <- DGEList(assays(olap)$counts, group=rownames(colData(olap)))

```

### 3 Counting Modes

The modes of "Union", "IntersectionStrict" and "IntersectionNotEmpty" provide different approaches to resolving reads that overlap multiple features. Figure 1 illustrates how both simple and gapped reads are handled by the modes. Note that a read is counted a maximum of once; there is no double counting. These methods do not currently handle paired-end reads. For additional detail on the counting modes see the `summarizeOverlaps` man page.

|  | Union     | IntersectionStrict | IntersectionNotEmpty |
|--|-----------|--------------------|----------------------|
|  | Feature 1 | Feature 1          | Feature 1            |
|  | Feature 1 | No hit             | Feature 1            |
|  | Feature 1 | No hit             | Feature 1            |
|  | Feature 1 | Feature 1          | Feature 1            |
|  | Feature 1 | Feature 1          | Feature 1            |
|  | No hit    | Feature 1          | Feature 1            |
|  | No hit    | No hit             | No hit               |

\* Picture reproduced from HTSeq web site :  
<http://www-huber.embl.de/users/anders/HTSeq/doc/count.html>

Figure 1: Counting Modes

## 4 Counting Features

Features can be exons, transcripts, genes or any region of interest. The number of ranges that define a single feature is specified in the **features** argument.

When annotation regions of interest are defined by a single range a *GRanges* should be used as the **features** argument. With a *GRanges* it is assumed that each row (i.e., each range) represents a distinct feature. If **features** was a *GRanges* of exons, the result would be counts per exon.

When the region of interest is defined by one or more ranges the **features** argument should be a *GRangesList*. In practice this could be a list of exons by gene or transcripts by gene or other similar relationships. The count result will

be the same length as the *GRangesList*. For a list of exons by genes, the result would be counts per gene.

The combination of defining the features as either *GRanges* or *GRangesList* and choosing a counting mode controls how `summarizeOverlaps` assigns hits. Regardless of the mode chosen, each read is assigned to at most a single feature. These options are intended to provide flexibility in defining different biological problems.

This next example demonstrates how the same read can be counted differently depending on how the `features` argument is specified. We use a single read that overlaps two ranges, `gr1` and `gr2`.

```
> rd <- GappedAlignments("a", seqnames = Rle("chr1"), pos = as.integer(100),
+   cigar = "300M", strand = strand("+"))
> gr1 <- GRanges("chr1", IRanges(start=50, width=150), strand="+")
> gr2 <- GRanges("chr1", IRanges(start=350, width=150), strand="+")
```

When provided as a *GRanges* both `gr1` and `gr2` are considered distinct features. In this case none of the modes count the read as a hit. Mode `Union` discards the read because more than 1 feature is overlapped. `IntersectionStrict` requires the read to fall completely within a feature which is not the case for either `gr1` or `gr2`. `IntersectionNotEmpty` requires the read to overlap a single unique disjoint region of the features. In this case `gr1` and `gr2` do not overlap so each range is considered a unique disjoint region. However, the read overlaps both `gr1` and `gr2` so a decision cannot be made and the read is discarded.

```
> gr <- c(gr1, gr2)
> data.frame(union = assays(summarizeOverlaps(gr, rd))$counts,
+   intStrict = assays(summarizeOverlaps(gr, rd,
+   mode="IntersectionStrict"))$counts,
+   intNotEmpty = assays(summarizeOverlaps(gr, rd,
+   mode="IntersectionNotEmpty"))$counts)

  union intStrict intNotEmpty
1     0          0           0
2     0          0           0
```

Next we count with `features` as a *GRangesList*; this is list of length 1 with 2 elements. Modes `Union` and `IntersectionNotEmpty` both count the read for the single feature.

```
> grl <- GRangesList(c(gr1, gr2))
> data.frame(union = assays(summarizeOverlaps(grl, rd))$counts,
+   intStrict = assays(summarizeOverlaps(grl, rd,
+   mode="IntersectionStrict"))$counts,
+   intNotEmpty = assays(summarizeOverlaps(grl, rd,
+   mode="IntersectionNotEmpty"))$counts)

  union intStrict intNotEmpty
1     1          0           1
```

In this more complicated example we have 7 reads, 5 are simple and 2 have gaps in the CIGAR. There are 12 ranges that will serve as the **features**.

```
> group_id <- c("A", "B", "C", "C", "D", "D", "E", "F", "G", "G", "H", "H")
> features <- GRanges(
+   seqnames = Rle(c("chr1", "chr2", "chr1", "chr1", "chr2", "chr2",
+   "chr1", "chr1", "chr2", "chr2", "chr1", "chr1")),
+   strand = strand(rep("+", length(group_id))),
+   ranges = IRanges(
+     start=c(1000, 2000, 3000, 3600, 7000, 7500, 4000, 4000, 3000, 3350, 5000, 5400),
+     width=c(500, 900, 500, 300, 600, 300, 500, 900, 150, 200, 500, 500)),
+   DataFrame(group_id)
+ )
> reads <- GappedAlignments(
+   names = c("a", "b", "c", "d", "e", "f", "g"),
+   seqnames = Rle(c(rep(c("chr1", "chr2"), 3), "chr1")),
+   pos = as.integer(c(1400, 2700, 3400, 7100, 4000, 3100, 5200)),
+   cigar = c("500M", "100M", "300M", "500M", "300M", "50M200N50M", "50M150N50M"),
+   strand = strand(rep.int("+", 7L)))
>
```

Using a *GRanges* as the **features** all 12 ranges are considered to be different features and counts are produced for each row,

```
> data.frame(union = assays(summarizeOverlaps(features, reads))$counts,
+   intStrict = assays(summarizeOverlaps(features, reads,
+     mode="IntersectionStrict"))$counts,
+   intNotEmpty = assays(summarizeOverlaps(features, reads,
+     mode="IntersectionNotEmpty"))$counts)
```

|    | union | intStrict | intNotEmpty |
|----|-------|-----------|-------------|
| 1  | 1     | 0         | 1           |
| 2  | 1     | 1         | 1           |
| 3  | 0     | 0         | 0           |
| 4  | 0     | 0         | 0           |
| 5  | 0     | 1         | 1           |
| 6  | 0     | 0         | 0           |
| 7  | 0     | 0         | 0           |
| 8  | 0     | 0         | 0           |
| 9  | 0     | 0         | 0           |
| 10 | 0     | 0         | 0           |
| 11 | 0     | 1         | 1           |
| 12 | 0     | 0         | 0           |

When the data are split by group to create a *GRangesList* the highest list-levels are treated as different features and the multiple list elements are considered part of the same features. Counts are returned for each group.

```

> lst <- split(features, mcols(features)[["group_id"]])
> length(lst)

[1] 8

> data.frame(union = assays(summarizeOverlaps(lst, reads))$counts,
+           intStrict = assays(summarizeOverlaps(lst, reads,
+           mode="IntersectionStrict"))$counts,
+           intNotEmpty = assays(summarizeOverlaps(lst, reads,
+           mode="IntersectionNotEmpty"))$counts)

```

|   | union | intStrict | intNotEmpty |
|---|-------|-----------|-------------|
| A | 1     | 0         | 1           |
| B | 1     | 1         | 1           |
| C | 1     | 0         | 1           |
| D | 1     | 1         | 1           |
| E | 0     | 0         | 0           |
| F | 0     | 0         | 0           |
| G | 1     | 1         | 1           |
| H | 1     | 1         | 1           |

If desired, users can supply their own counting function as the `mode` argument and take advantage of the infrastructure for counting over multiple BAM files and parsing the results into a *SummarizedExperiment*. See `?BamViews-class` or `?BamFile-class` in *Rsamtools*.

## 5 pasilla Data

In this exercise we count the *pasilla* data by gene and by transcript then create a *CountDataSet*. This object can be used in differential expression methods offered in the *DESeq* package.

### 5.1 source files

Files are available through NCBI Gene Expression Omnibus (GEO), accession number GSE18508. <http://www.ncbi.nlm.nih.gov/projects/geo/query/acc.cgi?acc=GSE18508>. SAM files can be converted to BAM with the `asBam` function in the *Rsamtools* package. Of the seven files available, 3 are single-reads and 4 are paired-end. Smaller versions of *untreated1* (single-end) and *untreated2* (paired-end) have been made available in the *pasillaBamSubset* package. This subset includes chromosome 4 only.

`summarizeOverlaps` is capable of counting paired-end reads in both a *BamFile*-method (set argument `singleEnd=TRUE`) or a *GappedAlignmentPairs*-method. For this example, we use the 3 single-end read files,

- *treated1.bam*

- untreated1.bam
- untreated2.bam

Annotations are retrieved as a GTF file from the ENSEMBL web site. We download the file our local disk, then use Rtracklayer's `import` function to parse the file to a *GRanges* instance.

```
> library(rtracklayer)
> fl <- paste0("ftp://ftp.ensembl.org/pub/release-62/",
+             "gtf/drosophila_melanogaster/",
+             "Drosophila_melanogaster.BDGP5.25.62.gtf.gz")
> gffFile <- file.path(tempdir(), basename(fl))
> download.file(fl, gffFile)
> gff0 <- import(gffFile, asRangedData=FALSE)
```

Subset on the protein-coding, exon regions of chromosome 4 and split by gene id.

```
> idx <- mcols(gff0)$source == "protein_coding" &
+       mcols(gff0)$type == "exon" &
+       seqnames(gff0) == "4"
> gff <- gff0[idx]
> ## adjust seqnames to match Bam files
> seqlevels(gff) <- paste("chr", seqlevels(gff), sep="")
> chr4genes <- split(gff, mcols(gff)$gene_id)
```

## 5.2 counting

The `params` argument can be used to subset the reads in the bam file on characteristics such as position, unmapped or paired-end reads. Quality scores or the "NH" tag, which identifies reads with multiple mappings, can be included as metadata columns for further subsetting. See `?ScanBamParam` for details about specifying the `param` argument.

```
> param <- ScanBamParam(
+   what='qual',
+   which=GRanges("chr4", IRanges(1, 1e6)),
+   flag=scanBamFlag(isUnmappedQuery=FALSE, isPaired=NA),
+   tag="NH")
```

We use `summarizeOverlaps` to count with the default mode of "Union". If a `param` argument is not included all reads from the BAM file are counted.

```
> fls <- c("treated1.bam", "untreated1.bam", "untreated2.bam")
> path <- "pathToBAMFiles"
> bamlst <- BamFileList(fls, index=character())
> genehits <- summarizeOverlaps(chr4genes, bamlst, mode="Union")
```

A `CountDataSet` is constructed from the counts and experiment data in *pasilla*.

```

> expdata = new("MIAME",
+               name="pasilla knockdown",
+               lab="Genetics and Developmental Biology, University of
+                 Connecticut Health Center",
+               contact="Dr. Brenton Graveley",
+               title="modENCODE Drosophila pasilla RNA Binding Protein RNAi
+                 knockdown RNA-Seq Studies",
+               url="http://www.ncbi.nlm.nih.gov/projects/geo/query/acc.cgi?acc=GSE18508",
+               abstract="RNA-seq of 3 biological replicates of from the Drosophila
+                 melanogaster S2-DRSC cells that have been RNAi depleted of mRNAs
+                 encoding pasilla, a mRNA binding protein and 4 biological replicates
+                 of the the untreated cell line.")
> pubMedIds(expdata) <- "20921232"
> design <- data.frame(
+   condition=c("treated", "untreated", "untreated"),
+   replicate=c(1,1,2),
+   type=rep("single-read", 3),
+   countfiles=path(colData(genehits)[,1]), stringsAsFactors=TRUE)
> geneCDS <- newCountDataSet(
+   countData=assays(genehits)$counts,
+   conditions=design)
> experimentData(geneCDS) <- expdata
> sampleNames(geneCDS) = colnames(genehits)

```

If the primary interest is to count by transcript instead of by gene, the annotation file can be split on transcript id.

```

> chr4tx <- split(gff, mcols(gff)$transcript_id)
> txhits <- summarizeOverlaps(chr4tx, bam1st)
> txCDS <- newCountDataSet(assays(txhits)$counts, design)
> experimentData(txCDS) <- expdata

```

## 6 References

<http://www-huber.embl.de/users/anders/HTSeq/doc/overview.html> <http://www-huber.embl.de/users/anders/HTSeq/doc/count.html>
